# Supplementary material for: Metabolomic Profiling, In Vitro Antimalarial Investigation and In Silico Modeling of the Marine Actinobacterium Strain Rhodococcus sp. UR111 Associated with the Soft Coral Nephthea sp
Source: MDPI journal article supplement (doi:10.3390/antibiotics11111631), 2022-11-15
Supplement: s1 [file s1]

## Supporting Information

### Molecular Docking Simulations

Indene propanoic acid derivative (Molecule 3)

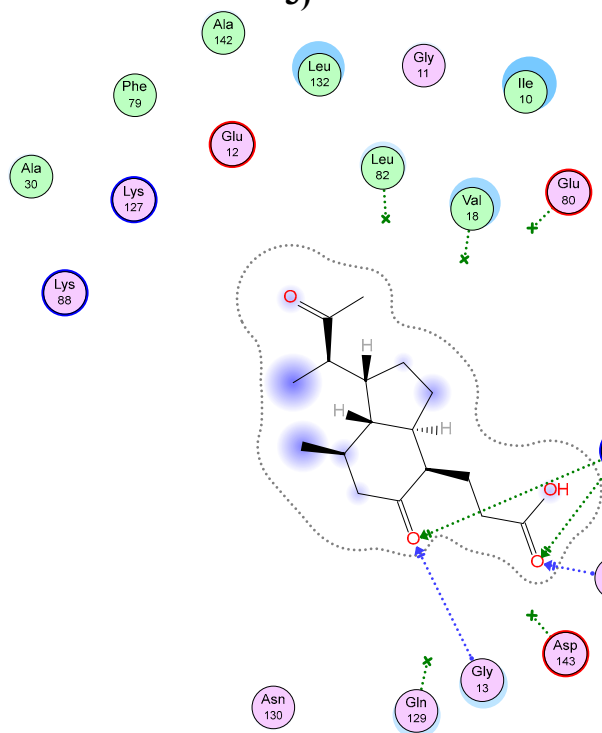

Rhodinodohyde (Molecule 5)

Indole-3-acetic acid (Molecule 4)

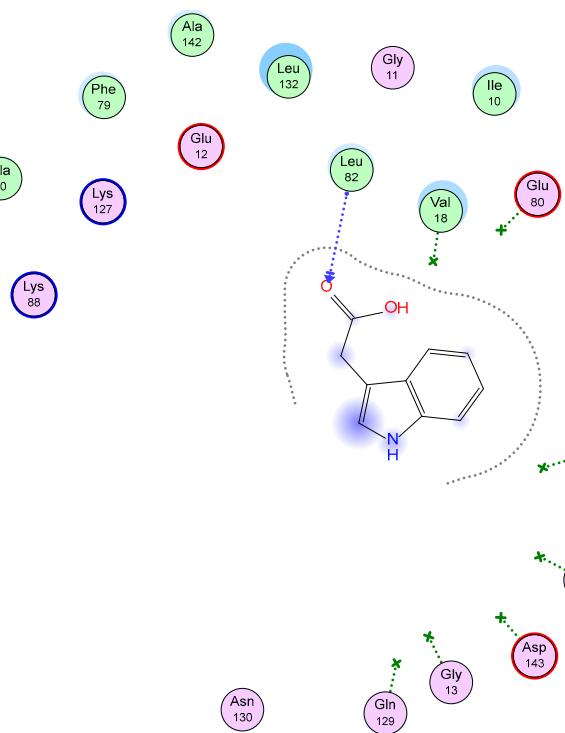

Mitomycin-K (Molecule 6)

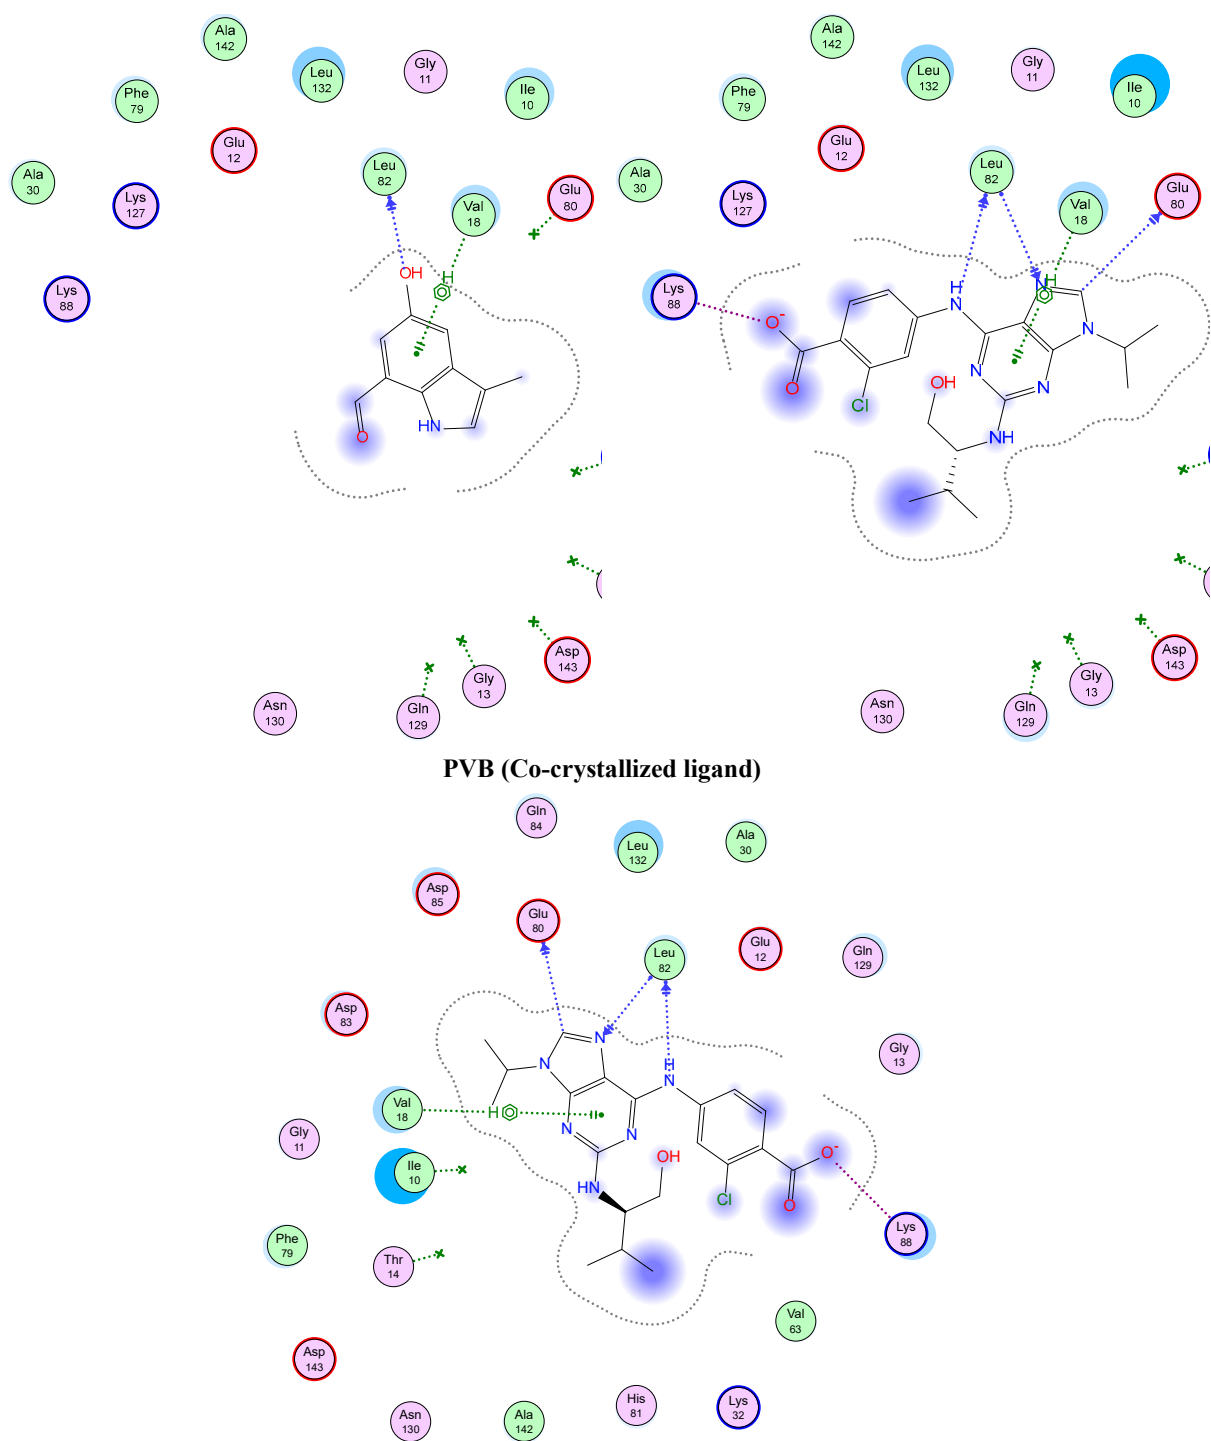

**Figure S1.** Presumptive mode of interaction of molecules **3**, **4**, **5**, **6**, and **PVB** within active site of *P. falciparum* kinase (PDB ID: 1V0P)

### Indene propanoic acid derivative (Molecule 3)

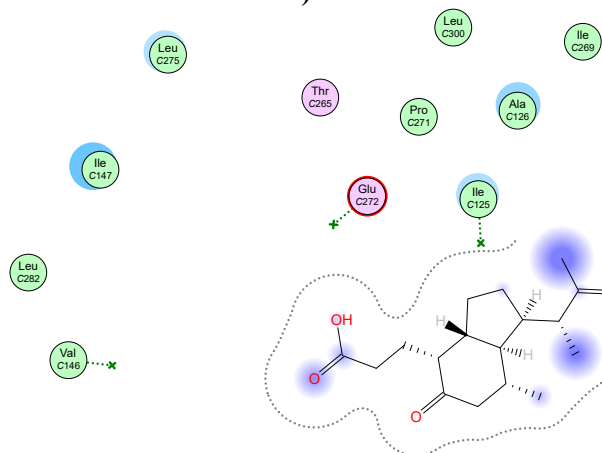

### Indole-3-acetic acid (Molecule 4)

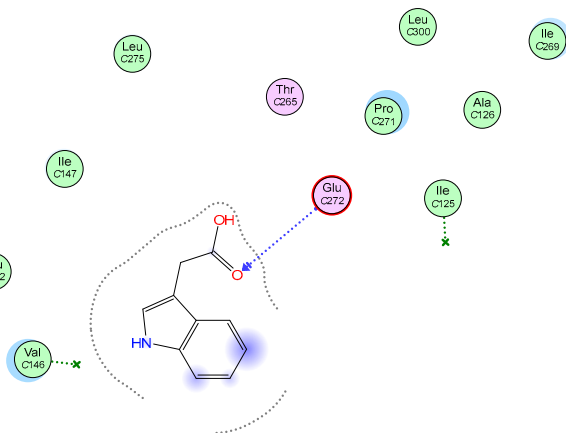

### Rhodinodohyde (Molecule 5)

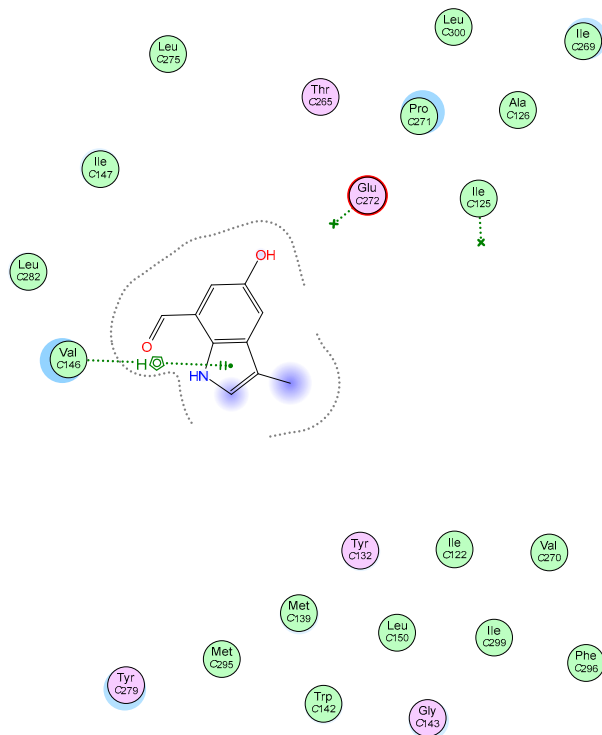

### Mitomycin-K (Molecule 6)

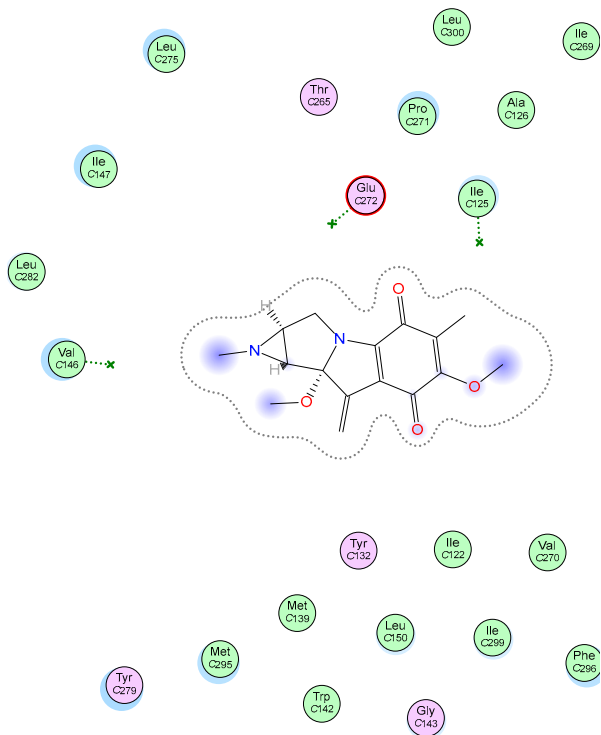

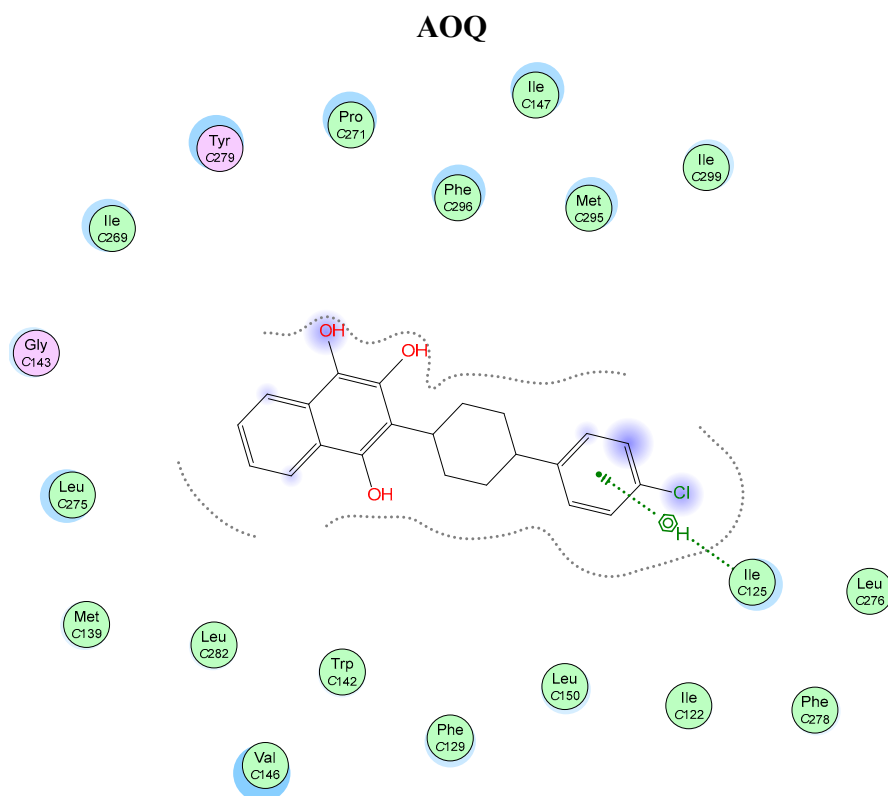

**Figure S2.** Presumptive mode of interaction of molecules **3**, **4**, **5**, **6**, and **AOQ** within active site of *P. falciparum* mitochondrial cytochrome bc1 complex (PDB ID: 4PD4).

Indene propanoic acid derivative (**Molecule 3**)

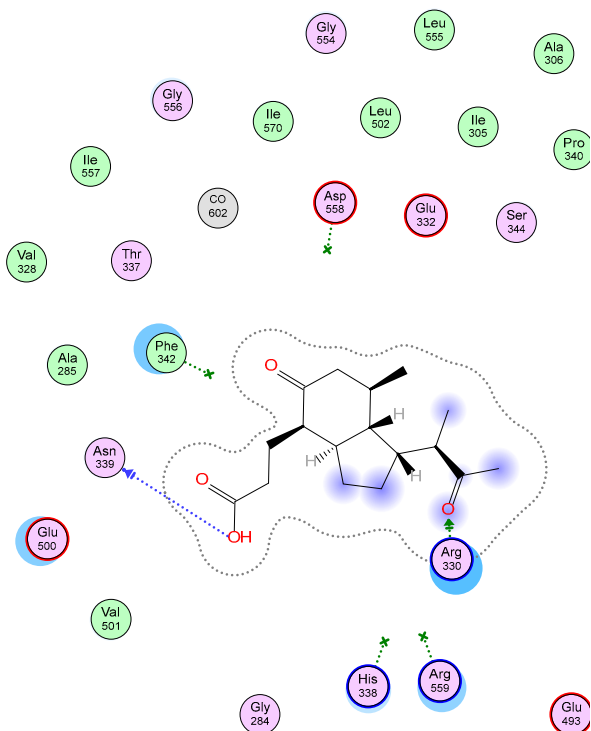

Indole-3-acetic acid (**Molecule 4**)

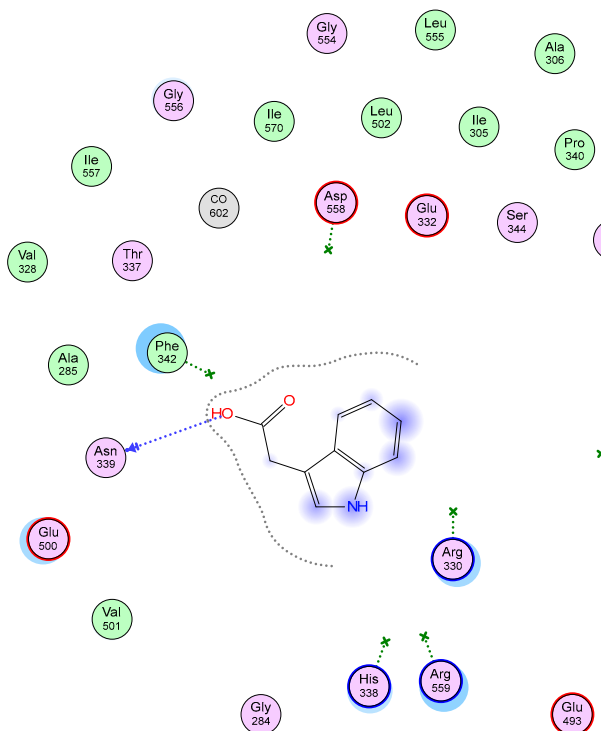

Rhodinodohyde (**Molecule 5**)

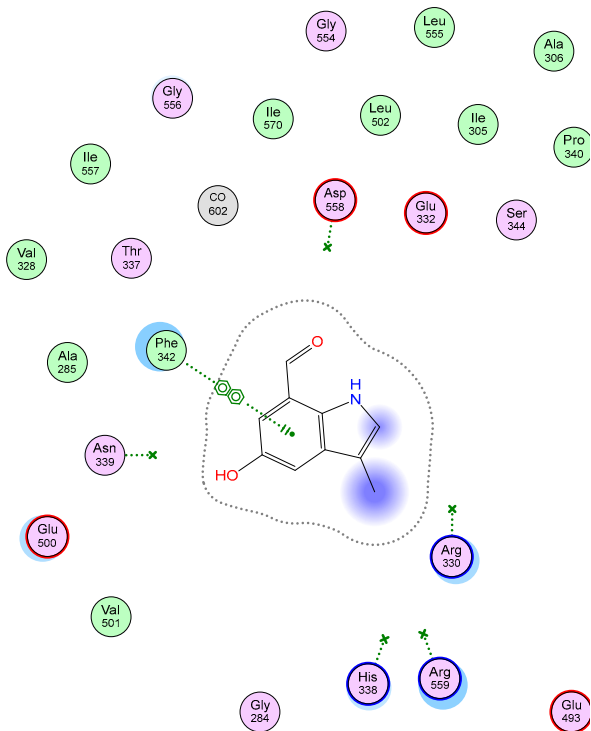

Mitomycin-K (**Molecule 6**)

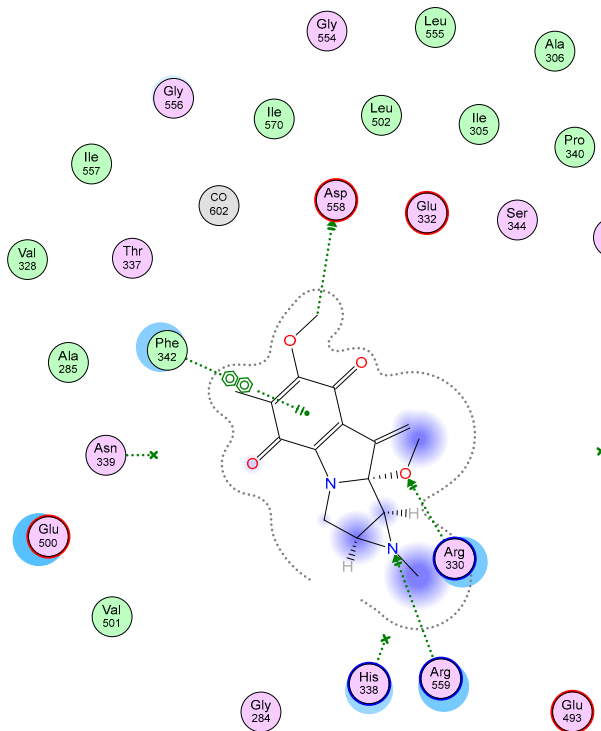

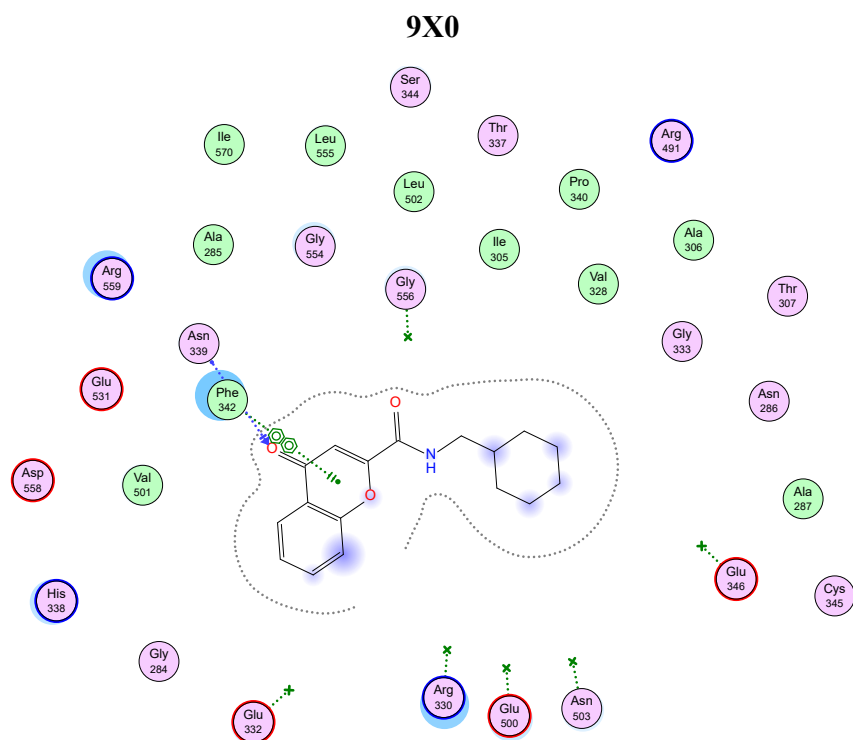

**Figure S3.** Presumptive mode of interaction of molecules **3**, **4**, **5**, **6**, and **9X0** within active site of *P. falciparum* lysyl-tRNA synthetase (PfKRS1; PDB ID: 6AGT)
